# Supplementary material for: Development of a Web Tool to Calculate the Cumulative Dose of Glucocorticoids
Source: Research Square preprint supplement (doi:10.21203/rs.3.rs-146726/v1), 2021-01-18
Supplement: Supplementary file 1 [file 5cb1becc3fde1d8e8c92b73f.docx]

**Supplementary material**

- To register with the application, it is necessary to have an email account and select the country of residence and the name of the hospital where the user works.

- The password will be chosen by the user.

- As the data is entered, the system will calculate the value of the accumulated dose as prednisone equivalent in mg.

- It is possible to include information from several patients simultaneously. In this case, the application will assign a random number to each patient. This number should be kept by the user in a codebook.

- Data will be available to the user each time he/she logs in.

- The information about the country and the hospital from which it is accessed will be used to know how this tool is used.

- The developers will not have access to patient information.
